# Supplementary material
Source: publisher figshare collection journal article supplement (https://karger.figshare.com/articles/dataset/_/4557571)
Supplement: Supplementary file 1 [file 1]

A

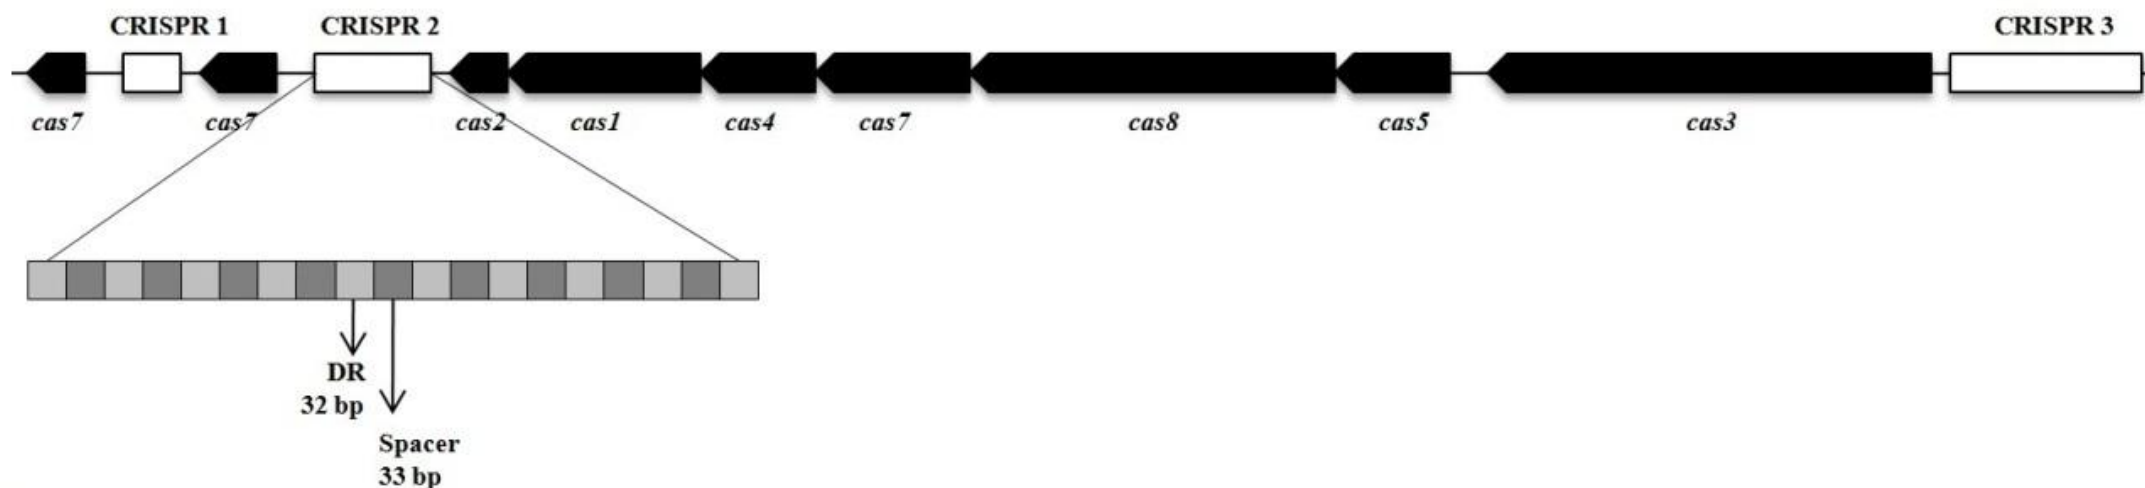

B

|       |                                  |                                     |       |
|-------|----------------------------------|-------------------------------------|-------|
| 41244 | ATTTCAATCCACGCTCCTATATAAGGTGCGAC | GATTGCGCCAGGTAAACACTTGCTATACTCTCAT  | 41309 |
| 41310 | ATTTCAATCCACGCTCCTATATAAGGTGCGAC | CCTTCCAGTGGTGCGTTTTTGCGAAGTTGTACCAG | 41375 |
| 41376 | ATTTCAATCCACGCACCTATATAAGGTGCGAC | AGTTGGTGTTAAGTACACTTGTGATAAATGCAAA  | 41441 |
| 41442 | ATTTCAATCCACGCACCTATATAAGGTGCGAC | CCCATTTCCGCTACGGTCGTTCCACTTGTTGTATT | 41508 |
| 41509 | ATTTCAATCCACGCACCTATATAAGGTGCGAC | ATCTACGACCGCTGCATGACCTACTAGGGA ACTA | 41574 |
| 41575 | ATTTCAATCCACGCACCTATATAAGGTGCGAC | TGATTTTAATCTTTTCCCTTACTTTTGGGGTTG   | 41639 |
| 41640 | ATTTCAATCCACGCACCTATATAAGGTGCGAC | TTAGTTGCTCCAATGGAAAGGCTCAACATCAA    | 41703 |
| 41704 | ATTTCAATCCACGCACCTATATAAGGTGCGAC | TTTTGTTGAAATCATCCATTGCTTTACCTATTTTT | 41771 |
| 41772 | TTTTCAATCCACGCACCTATATAAGGTGCGAC | TGACGAATAGGGGATACGTGGTAGTAATGTGTT   | 41836 |
| 41837 | TTTTCAATCCACGCACCTATATAAGGTGCGAC |                                     | 41868 |
